# Supplementary material for: Higher burden of rare frameshift indels in genes related to synaptic transmission separate familial hemiplegic migraine from common types of migraine
Source: PubMed Central journal article supplement — J Med Genet. 2020 Jan 24;57(9):610–6. doi: 10.1136/jmedgenet-2019-106640 (PMC7476275; doi:10.1136/jmedgenet-2019-106640), 2020-01-24
Supplement: jmedgenet-2019-106640supp001.pdf [file jmedgenet-2019-106640supp001.pdf]

**Table 1: Sex distribution, age at onset, attack and headache symptoms**

|                                        | FHM<br>(n=112)     | Familial MA<br>(n=487) |
|----------------------------------------|--------------------|------------------------|
| <b>Sex distribution (men:women)</b>    | 1:3.3 (26 M, 86 W) | 1:2.3 (148 M, 339 W)   |
| <b>Mean age at onset (years;range)</b> | 16.5 (1-42)        | 21.4 (4-77)            |
| <b>Lifetime number of attacks:</b>     |                    |                        |
| 1                                      | 0 (0%)             | 5 (1%)                 |
| 2 to 4                                 | 18 (16%)           | 37 (8%)                |
| 5 to 9                                 | 7 (6%)             | 37 (8%)                |
| 10 to 49                               | 21 (19%)           | 155 (32%)              |
| 50 to 100                              | 19 (17%)           | 115 (24%)              |
| > 100                                  | 46 (41%)           | 129 (27%)              |
| <b>Duration of attack:</b>             |                    |                        |
| <30 minuts                             | 0 (0%)             | 2 (0.5%)               |
| 30 min - 4 hours                       | 8 (7%)             | 119 (26%)              |
| 4 h - 24 h                             | 70 (63%)           | 254 (56%)              |
| 24 h - 72 h                            | 32 (29%)           | 70 (15%)               |
| 3 days - 7 days                        | 1 (1%)             | 8 (2%)                 |
| > 7 days                               | 0 (0%)             | 2 (0.5%)               |
| <b>Headache phase:</b>                 |                    |                        |
| Unilateral                             | 59%                | 59%                    |
| Pulsating                              | 86%                | 55%                    |
| Moderate/severe intensity              | 99%                | 85%                    |
| Aggravation by physical exercise       | 97%                | 80%                    |
| Nausea                                 | 84%                | 70%                    |
| Vomiting                               | 61%                | 43%                    |
| Photophobia                            | 89%                | 79%                    |
| Phonophobia                            | 87%                | 58%                    |

FHM: familial hemiplegic migraine. MA: Migraine with typical aura. MO: Migraine without aura.

**toms for FHM, familial MA/MO and sporadic MA/MO**

| Familial MO<br>(n=253) | Sporadic MA<br>(n=750) | Sporadic MO<br>(n=954) |
|------------------------|------------------------|------------------------|
| 1:1.9 (86 M, 167 W)    | 1:3.7 (160 M, 587 W)   | 1:6.2 (133 M, 817 W)   |
| 19.4 (0-64)            | 22.8 (0-70)            | 21 (2-60)              |
| 6 (2%)                 | 5 (1%)                 | 0 (0%)                 |
| 7 (3%)                 | 41 (6%)                | 1 (0%)                 |
| 10 (4%)                | 39 (5%)                | 2 (0%)                 |
| 61 (25%)               | 161 (22%)              | 32 (3%)                |
| 46 (19%)               | 108 (15%)              | 80 (8%)                |
| 118 (48%)              | 385 (52%)              | 833 (88%)              |
| 0 (0%)                 | 6 (1%)                 | 1 (0%)                 |
| 17 (7%)                | 73 (10%)               | 11 (1%)                |
| 150 (60%)              | 292 (42%)              | 306 (32%)              |
| 66 (27%)               | 271 (39%)              | 524 (55%)              |
| 14 (56%)               | 56 (8%)                | 100 (11%)              |
| 2 (1%)                 | 3 (1%)                 | 7 (1%)                 |
| 58%                    | 73%                    | 83%                    |
| 69%                    | 65%                    | 72%                    |
| 99%                    | 93%                    | 99%                    |
| 88%                    | 84%                    | 92%                    |
| 81%                    | 81%                    | 88%                    |
| 44%                    | 55%                    | 60%                    |
| 79%                    | 89%                    | 91%                    |
| 72%                    | 78%                    | 85%                    |

aura.
