# Supplementary material for: Higher burden of rare frameshift indels in genes related to synaptic transmission separate familial hemiplegic migraine from common types of migraine
Source: PubMed Central journal article supplement — J Med Genet. 2020 Jan 24;57(9):610–6. doi: 10.1136/jmedgenet-2019-106640 (PMC7476275; doi:10.1136/jmedgenet-2019-106640), 2020-01-24
Supplement: jmedgenet-2019-106640supp002.pdf [file jmedgenet-2019-106640supp002.pdf]

**Table 2: Comparison of aura symptoms in patients with FHM, familial MA**

|                                        | FHM<br>(n=112)               |
|----------------------------------------|------------------------------|
| <b>Motor aura</b>                      |                              |
| Overall                                | 100%                         |
| Unilateral                             | 100%                         |
| Face/tongue                            | 51%/55%                      |
| Hand/arm                               | 97%/94%                      |
| Foot/leg                               | 56%/55%                      |
| Body                                   | 27%                          |
| Duration (Median, IQR)                 | 2 h (1 h : 6 h)              |
| <b>Visual aura</b>                     |                              |
| Overall                                | 94%                          |
| Unilateral                             | 62%                          |
| Flickering light/zigzag lines          | 90%/49%                      |
| Scotoma                                | 77%                          |
| Duration (Median, IQR)                 | 52 min (30 min : 1 h 38 min) |
| <b>Sensory aura</b>                    |                              |
| Overall                                | 97%                          |
| Unilateral                             | 100%                         |
| Face/tongue                            | 83%/80%                      |
| Hand/arm                               | 99%/95%                      |
| Foot/leg                               | 64%/64%                      |
| Body                                   | 34%                          |
| Duration (Median, IQR)                 | 2 h (1 h : 3 h)              |
| <b>Aphasic aura</b>                    |                              |
| Overall                                | 75%                          |
| Paraphasia or difficulty finding words | 53%                          |
| Impaired language production           | 88%                          |
| Impaired comprehension                 | 9%                           |
| Duration (Median, IQR)                 | 1 h (30 min : 2 h)           |
| <b>Basilar-type aura</b>               |                              |
| Overall                                | 74%                          |
| Dysarthria                             | 74%                          |
| Vertigo                                | 72%                          |
| Tinnitus                               | 35%                          |
| Hypacusia                              | 46%                          |
| Diplopia                               | 51%                          |
| Bilateral visual symptoms              | 52%                          |
| Decreased level of consciousness       | 28%                          |
| Simultaneous bilateral paraesthesias   | 9%                           |
| <b>Ataxia/Loss of balance</b>          | 19%/71%                      |

FHM: familial hemiplegic migraine. MA: Migraine with typical aura

**and sporadic MA**

| Familial MA<br>(n=487)   | Sporadic MA<br>(n=750) |
|--------------------------|------------------------|
| 0%                       | 0%                     |
| -                        | -                      |
| -                        | -                      |
| -                        | -                      |
| -                        | -                      |
| -                        | -                      |
| 95%                      | 96%                    |
| 67%                      | 70%                    |
| 87%/52%                  | 82%/44%                |
| 62%                      | 51%                    |
| 30 min (17 min : 45 min) | 30 min (20 min : 1 h)  |
| 40%                      | 51%                    |
| 87%                      | 87%                    |
| 67%/40%                  | 66%/44%                |
| 88%/55%                  | 76%/63%                |
| 14%/14%                  | 23%/21%                |
| 10%                      | 11%                    |
| 30 min (15 min : 45 min) | 30 min (14 min : 1 h)  |
| 33%                      | 28%                    |
| 81%                      | 79%                    |
| 61%                      | 64%                    |
| 24%                      | 17%                    |
| 6 min (3 min : 12 min)   | 30 min (15 min - 1 h)  |
| 10%                      | 25%                    |
| 40%                      | 24%                    |
| 44%                      | 55%                    |
| 24%                      | 37%                    |
| 12%                      | 18%                    |
| 45%                      | 38%                    |
| 49%                      | 43%                    |
| 29%                      | 18%                    |
| 18%                      | 18%                    |
| 4%/-                     | 11%/-                  |
