# Supplementary material for: Higher burden of rare frameshift indels in genes related to synaptic transmission separate familial hemiplegic migraine from common types of migraine
Source: PubMed Central journal article supplement — J Med Genet. 2020 Jan 24;57(9):610–6. doi: 10.1136/jmedgenet-2019-106640 (PMC7476275; doi:10.1136/jmedgenet-2019-106640), 2020-01-24
Supplement: jmedgenet-2019-106640supp004.pdf [file jmedgenet-2019-106640supp004.pdf]

## FHM\_vs\_SporadicMigraine

| Gene     | P-value  | adjusted P-value |
|----------|----------|------------------|
| ABCA13   | 4.05E-80 | 3.09E-77         |
| ANKRD27  | 1.12E-08 | 8.57E-06         |
| ARHGAP39 | 4.92E-71 | 3.75E-68         |
| ATAD2    | 1.90E-05 | 1.45E-02         |
| CAMSAP2  | 4.81E-16 | 3.67E-13         |
| CASQ1    | 1.81E-36 | 1.38E-33         |
| CCT4     | 5.75E-06 | 4.38E-03         |
| CHRNA2   | 1.03E-16 | 7.86E-14         |
| CST5     | 3.09E-75 | 2.35E-72         |
| CUL9     | 2.58E-16 | 1.97E-13         |
| CYLD     | 7.28E-11 | 5.54E-08         |
| DCBLD1   | 8.38E-98 | 6.39E-95         |
| DHX37    | 3.78E-16 | 2.88E-13         |
| DNAH1    | 4.34E-07 | 3.30E-04         |
| DNM2     | 1.11E-44 | 8.47E-42         |
| DSCAM    | 4.70E-33 | 3.58E-30         |
| EEPD1    | 3.98E-22 | 3.03E-19         |
| ENTPD2   | 2.90E-19 | 2.21E-16         |
| FAM120C  | 1.64E-06 | 1.25E-03         |
| FAM135A  | 2.91E-20 | 2.22E-17         |
| FGFR1    | 5.05E-85 | 3.85E-82         |
| FIGN     | 9.10E-92 | 6.94E-89         |
| FMNL2    | 1.87E-43 | 1.42E-40         |
| FNDC7    | 2.39E-09 | 1.82E-06         |
| FRAS1    | 1.37E-07 | 1.04E-04         |
| GNAI2    | 3.35E-83 | 2.55E-80         |
| GNAO1    | 3.31E-76 | 2.53E-73         |
| GRIN2A   | 3.46E-52 | 2.63E-49         |
| HEATR9   | 3.30E-91 | 2.51E-88         |
| HERC1    | 1.74E-17 | 1.33E-14         |
| IGFN1    | 2.86E-06 | 2.18E-03         |
| IL1RAPL1 | 1.12E-06 | 8.50E-04         |
| INF2     | 1.06E-39 | 8.09E-37         |
| ITGAV    | 1.64E-06 | 1.25E-03         |
| ITSN1    | 2.44E-17 | 1.86E-14         |
| JMY      | 1.12E-06 | 8.50E-04         |
| KMT2E    | 5.75E-06 | 4.38E-03         |
| LDB3     | 1.24E-15 | 9.49E-13         |
| PIK3R3   | 3.92E-54 | 2.99E-51         |
| LPAR6    | 6.88E-49 | 5.24E-46         |
| LPCAT2   | 4.41E-50 | 3.36E-47         |
| LRGUK    | 7.10E-10 | 5.41E-07         |
| LRRC45   | 6.08E-50 | 4.64E-47         |
| MED16    | 1.19E-43 | 9.09E-41         |
| NAPA     | 4.18E-17 | 3.18E-14         |
| NCOR1    | 7.07E-30 | 5.39E-27         |

|                    |          |                  |
|--------------------|----------|------------------|
| NDUFAF7            | 7.02E-76 | 5.35E-73         |
| OR2T33             | 1.91E-11 | 1.46E-08         |
| OR2T8              | 6.28E-06 | 4.78E-03         |
| OR4D10             | 2.05E-62 | 1.56E-59         |
| OR4Q2              | 1.12E-08 | 8.57E-06         |
| OR4Q3              | 5.24E-35 | 3.99E-32         |
| OR5L1              | 3.62E-38 | 2.76E-35         |
| OR5L2              | 1.55E-19 | 1.18E-16         |
| OR5M9              | 7.16E-48 | 5.46E-45         |
| PAAF1              | 1.24E-15 | 9.49E-13         |
| PGM1               | 2.14E-12 | 1.63E-09         |
| PIK3R6             | 1.90E-05 | 1.45E-02         |
| PLCB3              | 3.23E-08 | 2.46E-05         |
| PPP1R3D            | 1.16E-25 | 8.87E-23         |
| PRDM2              | 1.08E-10 | 8.19E-08         |
| QRFPR              | 1.70E-23 | 1.30E-20         |
| RAB2A              | 4.18E-17 | 3.18E-14         |
| RNF111             | 1.24E-15 | 9.49E-13         |
| RPUSD2             | 9.41E-28 | 7.17E-25         |
| RSPH3              | 3.38E-74 | 2.57E-71         |
| SEC24C             | 2.37E-35 | 1.80E-32         |
| SEMA4B             | 1.16E-20 | 8.81E-18         |
| SLC23A2            | 6.46E-08 | 4.92E-05         |
| SLC2A10            | 1.21E-41 | 9.25E-39         |
| SLC5A9             | 6.34E-34 | 4.83E-31         |
| SPEN               | 2.27E-05 | 1.73E-02         |
| SPESP1             | 1.42E-35 | 1.08E-32         |
| SRSF4              | 3.61E-18 | 2.75E-15         |
| STRN3              | 5.78E-12 | 4.40E-09         |
| SYCP1              | 2.68E-07 | 2.04E-04         |
| SYNE1              | 8.90E-11 | 6.78E-08         |
| TAL1               | 7.96E-09 | 6.06E-06         |
| TAS2R43            | 1.90E-05 | 1.45E-02         |
| TBL1X              | 1.25E-45 | 9.56E-43         |
| TMEM41A            | 1.24E-15 | 9.49E-13         |
| TSHZ1              | 1.70E-08 | 1.29E-05         |
| TSPAN7             | 4.34E-07 | 3.30E-04         |
| TTN                | 5.89E-07 | 4.49E-04         |
| UHRF1BP1L          | 2.30E-57 | 1.75E-54         |
| UNC13C             | 4.34E-07 | 3.30E-04         |
| USP4               | 3.60E-14 | 2.74E-11         |
| UTP20              | 5.77E-17 | 4.40E-14         |
| VPS52              | 1.01E-42 | 7.68E-40         |
| ZCCHC11            | 2.26E-39 | 1.72E-36         |
| ZNF302             | 1.81E-07 | 1.38E-04         |
| ZSCAN21            | 1.24E-45 | 9.42E-43         |
| FHM_vs_FamMigraine |          |                  |
| Gene               | P-value  | adjusted P-value |

|                    |          |                  |
|--------------------|----------|------------------|
| ABCA13             | 4.08E-12 | 3.11E-09         |
| ARHGAP39           | 6.41E-11 | 4.88E-08         |
| CHRNA2             | 1.06E-07 | 8.11E-05         |
| CHRNA4             | 6.15E-13 | 4.69E-10         |
| CST2               | 1.47E-08 | 1.12E-05         |
| CST3               | 9.98E-08 | 7.60E-05         |
| DCBLD1             | 2.05E-13 | 1.56E-10         |
| ENTPD2             | 3.64E-07 | 2.78E-04         |
| FIGN               | 9.80E-06 | 7.47E-03         |
| GIMAP8             | 3.43E-06 | 2.61E-03         |
| GRIN2A             | 6.90E-08 | 5.26E-05         |
| HORMAD1            | 1.31E-13 | 9.96E-11         |
| JPH2               | 5.02E-06 | 3.83E-03         |
| PIK3R3             | 1.02E-05 | 7.80E-03         |
| LRRC45             | 2.34E-05 | 1.79E-02         |
| MUC5AC             | 2.30E-05 | 1.75E-02         |
| OR10A7             | 2.85E-07 | 2.17E-04         |
| OR4D10             | 7.06E-06 | 5.38E-03         |
| OR4Q3              | 1.31E-05 | 9.95E-03         |
| PRLR               | 7.72E-08 | 5.88E-05         |
| QRFPR              | 9.18E-06 | 6.99E-03         |
| SLC5A9             | 1.32E-06 | 1.01E-03         |
| SMOX               | 7.50E-08 | 5.72E-05         |
| SRSF4              | 2.73E-05 | 2.08E-02         |
| STK33              | 2.95E-06 | 2.25E-03         |
| STRN3              | 3.87E-06 | 2.95E-03         |
| TEX51              | 6.27E-05 | 4.78E-02         |
| TSC2               | 6.75E-07 | 5.14E-04         |
| UHRF1BP1L          | 5.84E-07 | 4.45E-04         |
| FHM_vs_AllMigraine |          |                  |
| Gene               | P-value  | adjusted P-value |
| ABCA13             | 3.09E-38 | 1.99E-35         |
| ARHGAP39           | 2.31E-34 | 1.49E-31         |
| ATAD2              | 9.11E-06 | 5.88E-03         |
| CAMSAP2            | 1.89E-10 | 1.22E-07         |
| CASQ1              | 7.19E-17 | 4.65E-14         |
| CHRNA2             | 8.10E-14 | 5.23E-11         |
| CST5               | 2.62E-15 | 1.69E-12         |
| CYLD               | 5.06E-05 | 3.27E-02         |
| DCBLD1             | 8.08E-47 | 5.22E-44         |
| DHX37              | 3.22E-09 | 2.08E-06         |
| DNM2               | 5.24E-14 | 3.38E-11         |
| DSCAM              | 1.28E-12 | 8.29E-10         |
| EEPD1              | 6.99E-10 | 4.51E-07         |
| ENTPD2             | 9.02E-15 | 5.83E-12         |
| FAM120C            | 1.50E-06 | 9.71E-04         |
| FAM135A            | 7.65E-09 | 4.94E-06         |
| FGFR1              | 3.63E-25 | 2.35E-22         |

|         |          |          |
|---------|----------|----------|
| FIGN    | 4.85E-31 | 3.13E-28 |
| FMNL2   | 1.46E-15 | 9.41E-13 |
| GIMAP8  | 6.08E-05 | 3.93E-02 |
| GNAI2   | 6.74E-20 | 4.36E-17 |
| GNAO1   | 3.36E-24 | 2.17E-21 |
| GRIN2A  | 9.97E-26 | 6.44E-23 |
| HEATR9  | 1.07E-25 | 6.89E-23 |
| HERC1   | 2.37E-07 | 1.53E-04 |
| IGFN1   | 5.47E-06 | 3.54E-03 |
| INF2    | 2.85E-07 | 1.84E-04 |
| ITSN1   | 8.95E-09 | 5.78E-06 |
| PIK3R3  | 4.12E-22 | 2.66E-19 |
| LPAR6   | 9.69E-15 | 6.26E-12 |
| LPCAT2  | 9.69E-14 | 6.26E-11 |
| LRGUK   | 6.84E-06 | 4.42E-03 |
| LRRC45  | 1.51E-20 | 9.74E-18 |
| MED16   | 4.37E-11 | 2.82E-08 |
| NAPA    | 2.29E-06 | 1.48E-03 |
| NCOR1   | 4.07E-10 | 2.63E-07 |
| NDUFAF7 | 3.59E-18 | 2.32E-15 |
| OR2T33  | 5.72E-08 | 3.70E-05 |
| OR4D10  | 2.62E-24 | 1.69E-21 |
| OR4Q2   | 2.14E-06 | 1.38E-03 |
| OR4Q3   | 3.42E-17 | 2.21E-14 |
| OR5L1   | 1.82E-16 | 1.18E-13 |
| OR5L2   | 1.78E-09 | 1.15E-06 |
| OR5M9   | 2.47E-11 | 1.60E-08 |
| PAAF1   | 6.53E-06 | 4.22E-03 |
| PGM1    | 2.00E-07 | 1.29E-04 |
| PPP1R3D | 6.56E-10 | 4.24E-07 |
| PRDM2   | 4.86E-07 | 3.14E-04 |
| QRFPR   | 4.09E-14 | 2.64E-11 |
| RAB2A   | 8.41E-09 | 5.43E-06 |
| RNF111  | 6.04E-05 | 3.90E-02 |
| RPUSD2  | 7.54E-14 | 4.87E-11 |
| RSPH3   | 6.46E-24 | 4.17E-21 |
| SEC24C  | 2.13E-14 | 1.38E-11 |
| SEMA4B  | 1.64E-11 | 1.06E-08 |
| SLC5A9  | 3.92E-18 | 2.53E-15 |
| SPESP1  | 2.99E-13 | 1.93E-10 |
| SRSF4   | 7.78E-12 | 5.03E-09 |
| STK33   | 3.23E-05 | 2.09E-02 |
| STRN3   | 2.20E-10 | 1.42E-07 |
| SYCP1   | 6.81E-06 | 4.40E-03 |
| SYNE1   | 4.56E-08 | 2.95E-05 |
| TAS2R43 | 1.97E-05 | 1.27E-02 |
| TBL1X   | 2.44E-17 | 1.58E-14 |
| TMEM41A | 4.48E-10 | 2.89E-07 |

|           |          |          |
|-----------|----------|----------|
| TSHZ1     | 1.42E-05 | 9.15E-03 |
| TSPAN7    | 4.50E-05 | 2.91E-02 |
| UHRF1BP1L | 2.06E-26 | 1.33E-23 |
| USP4      | 3.34E-06 | 2.16E-03 |
| UTP20     | 4.41E-07 | 2.85E-04 |
| VPS52     | 1.11E-11 | 7.15E-09 |
| ZCCHC11   | 6.51E-14 | 4.21E-11 |
| ZSCAN21   | 1.04E-07 | 6.71E-05 |
